# Supplementary material
Source: HighWire-hosted journal article supplement (http://www.cmaj.ca/highwire/filestream/58435/field_highwire_adjunct_files/0/pg1109eapp.pdf)
Supplement: pg1109eapp.pdf [file pg1109eapp.pdf]

---

**eAppendix: Age at death of men in custody, by cause of death and institution**

---

| Age group, yr | Institution and cause of death; no. (and %) of men |         |                   |         |             |         | Total*    |
|---------------|----------------------------------------------------|---------|-------------------|---------|-------------|---------|-----------|
|               | Federal penitentiary                               |         | Provincial prison |         | Police cell |         |           |
|               | Violent                                            | Natural | Violent           | Natural | Violent     | Natural |           |
| < 30          | 24                                                 | 2       | 23                | 4       | 11          | 1       | 65 (24)   |
| 30–39         | 30                                                 | 11      | 14                | 10      | 22          | 1       | 88 (32)   |
| 40–49         | 13                                                 | 12      | 6                 | 7       | 12          | 2       | 52 (19)   |
| ≥ 50          | 2                                                  | 41      | 3                 | 19      | 5           | 2       | 72 (25)   |
| Total         | 69 (25)                                            | 66 (24) | 46 (17)           | 40 (14) | 50 (18)     | 6 (2)   | 277 (100) |

\*Age not available for 6 men.
